# Supplementary material for: Changes in Distribution of Severe Neurologic Involvement in US Pediatric Inpatients With COVID-19 or Multisystem Inflammatory Syndrome in Children in 2021 vs 2020
Source: PubMed Central journal article supplement (PMC9641594; doi:10.1001/jamaneurol.2022.3881), 2022-11-07
Supplement: jamaneurol-e223881-s002.pdf [file jamaneurol-e223881-s002.pdf]

\*First name, last name, and suffix (if applicable) are required and will appear in PubMed.

| <b>*Group Name: Overcoming COVID-19 Investigators</b> |                   |                              |                  |             |                                          |                                                         |                                                                                            |
|-------------------------------------------------------|-------------------|------------------------------|------------------|-------------|------------------------------------------|---------------------------------------------------------|--------------------------------------------------------------------------------------------|
| <b>*First Name and Middle Initial(s)</b>              | <b>*Last Name</b> | <b>*Suffix (eg, Jr, III)</b> | Academic Degrees | Institution | Location (city, state/province, country) | Role or Contribution, eg, chair, principal investigator | Group (if more than 1 Group listed in the byline) and/or Subgroup (eg, Steering Committee) |
| Mary Glas                                             | Gaspers           |                              |                  |             |                                          |                                                         |                                                                                            |
| Ronald C                                              | Sanders           |                              |                  |             |                                          |                                                         |                                                                                            |
| Matt S                                                | Zinter            |                              |                  |             |                                          |                                                         |                                                                                            |
| Pia S                                                 | Pannaraj          |                              |                  |             |                                          |                                                         |                                                                                            |
| Emily                                                 | Port              |                              |                  |             |                                          |                                                         |                                                                                            |
| Sara                                                  | Shankman          |                              |                  |             |                                          |                                                         |                                                                                            |
| Rachel                                                | Mansour           |                              |                  |             |                                          |                                                         |                                                                                            |
| Christopher L                                         | Carroll           |                              |                  |             |                                          |                                                         |                                                                                            |
| Gwenn E                                               | McLaughlin        |                              |                  |             |                                          |                                                         |                                                                                            |
| Paula S                                               | Espinal           |                              |                  |             |                                          |                                                         |                                                                                            |
| Kelly N                                               | Michelson         |                              |                  |             |                                          |                                                         |                                                                                            |
| Bria M                                                | Coates            |                              |                  |             |                                          |                                                         |                                                                                            |
| Guru                                                  | Bhoojhawon        |                              |                  |             |                                          |                                                         |                                                                                            |
| Janice E                                              | Sullivan          |                              |                  |             |                                          |                                                         |                                                                                            |
| Vicki L                                               | Montgomery        |                              |                  |             |                                          |                                                         |                                                                                            |
| Ana Lia                                               | Graciano          |                              |                  |             |                                          |                                                         |                                                                                            |
| Susan V                                               | Lipton            |                              |                  |             |                                          |                                                         |                                                                                            |
| Mary Beth F                                           | Son               |                              |                  |             |                                          |                                                         |                                                                                            |
| Sabrina R                                             | Chen              |                              |                  |             |                                          |                                                         |                                                                                            |
| Julia                                                 | Worden            |                              |                  |             |                                          |                                                         |                                                                                            |
| Timothy                                               | McCadden          |                              |                  |             |                                          |                                                         |                                                                                            |
| Ryan W                                                | Carroll           |                              |                  |             |                                          |                                                         |                                                                                            |
| Phoebe H                                              | Yager             |                              |                  |             |                                          |                                                         |                                                                                            |
| Neil D                                                | Fernandes         |                              |                  |             |                                          |                                                         |                                                                                            |
| Janet R                                               | Hume              |                              |                  |             |                                          |                                                         |                                                                                            |
| Emily R                                               | Levy              |                              |                  |             |                                          |                                                         |                                                                                            |
| Lacy                                                  | Malloch           |                              |                  |             |                                          |                                                         |                                                                                            |
| Lora                                                  | Martin            |                              |                  |             |                                          |                                                         |                                                                                            |
| Candace                                               | Howard-Claudio    |                              |                  |             |                                          |                                                         |                                                                                            |
| David                                                 | Gourdy            |                              |                  |             |                                          |                                                         |                                                                                            |

## Supplemental Online Content: Nonauthor Collaborators

\*First name, last name, and suffix (if applicable) are required and will appear in PubMed.

| *First Name and Middle Initial(s) | *Last Name | *Suffix (eg, Jr, III) | Academic Degrees | Institution | Location (city, state/province, country) | Role or Contribution, eg, chair, principal investigator | Group (if more than 1 Group listed in the byline) and/or Subgroup (eg, Steering Committee) |
|-----------------------------------|------------|-----------------------|------------------|-------------|------------------------------------------|---------------------------------------------------------|--------------------------------------------------------------------------------------------|
| Philip C                          | Spinella   |                       |                  |             |                                          |                                                         |                                                                                            |
| Melissa L                         | Cullimore  |                       |                  |             |                                          |                                                         |                                                                                            |
| Russell J                         | McCulloh   |                       |                  |             |                                          |                                                         |                                                                                            |
| Lawrence C                        | Kleinman   |                       |                  |             |                                          |                                                         |                                                                                            |
| Simon                             | Li         |                       |                  |             |                                          |                                                         |                                                                                            |
| Joseph                            | Kuebler    |                       |                  |             |                                          |                                                         |                                                                                            |
| Adam J                            | Ratner     |                       |                  |             |                                          |                                                         |                                                                                            |
| Heda                              | Dapul      |                       |                  |             |                                          |                                                         |                                                                                            |
| Sule                              | Doymaz     |                       |                  |             |                                          |                                                         |                                                                                            |
| Michael A                         | Keenaghan  |                       |                  |             |                                          |                                                         |                                                                                            |
| Cody                              | Schwartz   |                       |                  |             |                                          |                                                         |                                                                                            |
| Steven L                          | Shein      |                       |                  |             |                                          |                                                         |                                                                                            |
| Amanda N                          | Lansell    |                       |                  |             |                                          |                                                         |                                                                                            |
| Ryan A                            | Nofziger   |                       |                  |             |                                          |                                                         |                                                                                            |
| Mary A                            | Staat      |                       |                  |             |                                          |                                                         |                                                                                            |
| Neal J                            | Thomas     |                       |                  |             |                                          |                                                         |                                                                                            |
| Andrew D                          | Butler     |                       |                  |             |                                          |                                                         |                                                                                            |
| Nelson                            | Reed       |                       |                  |             |                                          |                                                         |                                                                                            |
| Laura                             | Stewart    |                       |                  |             |                                          |                                                         |                                                                                            |
| Meena                             | Golcha     |                       |                  |             |                                          |                                                         |                                                                                            |
| Marian                            | Samperio   |                       |                  |             |                                          |                                                         |                                                                                            |
| Cindy                             | Bowens     |                       |                  |             |                                          |                                                         |                                                                                            |
| Mia                               | Maamari    |                       |                  |             |                                          |                                                         |                                                                                            |
| Hillary                           | Crandall   |                       |                  |             |                                          |                                                         |                                                                                            |
| Lincoln S                         | Smith      |                       |                  |             |                                          |                                                         |                                                                                            |
| John K                            | McGuire    |                       |                  |             |                                          |                                                         |                                                                                            |
| Manish M                          | Patel      |                       |                  |             |                                          |                                                         |                                                                                            |
